# Supplementary material for: Defining inkjet printing conditions of superconducting cuprate films through machine learning
Source: Royal Society of Chemistry journal article supplement (doi:10.1039/d1tc05913k), 2022-01-01

# Notebook description

This notebook uses various Python-based machine learning libraries to build machine learning models capable of predicting the variable Total Volume Deposited from other inkjet printing deposition experimental parameters.

## Loading the libraries and Preprocessing

### Import libraries

Load the libraries necessary to do data preparation and for machine learning.

```
In [ ]: # EDA and plotting libraries
import numpy as np
import pandas as pd
import matplotlib.pyplot as plt
import matplotlib.gridspec as gridspec
import seaborn as sns
import itertools
import os

# The Patch Library is imported to fix a Legend issue, not allowing to show more than 10
from matplotlib.patches import Patch

# Library to format the axes
import matplotlib.ticker as mtick

# Plots appear in the same notebook cell
%matplotlib inline

# Seaborn style
sns.set_style("ticks", {"xtick.major.size": 8, "ytick.major.size": 8})
sns.set_context("paper")

# Activate latex text rendering for figure labels
from matplotlib import rc
rc('text', usetex=False)

# Models from Scikit-Learn
from sklearn.linear_model import LinearRegression
from sklearn.ensemble import RandomForestRegressor, AdaBoostRegressor, GradientBoostingRegressor

# Preprocessing and feature selection
from sklearn.preprocessing import StandardScaler
from sklearn.utils import shuffle

# Model Evaluations
from sklearn.model_selection import train_test_split, cross_val_score, KFold, cross_val_predict
from sklearn.metrics import mean_squared_error

# Tree interpreter
from treeinterpreter import treeinterpreter as ti

# Shap library to explain models intuitively
import shap
```

```
shap.initjs() # Activate Javascript option for Jupyter notebooks

# Function to display dataframes side_by_side
from IPython.display import display
from IPython.display import display_html
def display_side_by_side(*args):
    html_str=''
    for df in args:
        html_str+=df.to_html()
    display_html(html_str.replace('table','table style="display:inline"'),raw=True)

# Ignore warning
import warnings
warnings.filterwarnings("ignore")
```

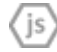

## Load data

We will load the `data_final.csv` file with the preprocessed data.

```
In [ ]: # Define the path
DATA_FINAL_PATH = "Data"
```

```
In [ ]: # Load dataset
def load_data(path = DATA_FINAL_PATH):
    path = os.path.join(path, "data_final.csv")
    data_final = pd.read_csv(path)
    return data_final

data_final = load_data()

data_final.shape
```

```
Out[ ]: (231, 8)
```

## Check the dataset

We will check the head and tail of the dataset to confirm it has been loaded correctly.

```
In [ ]: data_final.head()
```

```
Out[ ]:
```

|   | Average Voltage (V) | Average Pulse Length (us) | Average Drop Volume (pl) | Drop Pitch (um) | Line Pitch (um) | n° of drops | Total Volume Deposited (ul) | Amine (%) |
|---|---------------------|---------------------------|--------------------------|-----------------|-----------------|-------------|-----------------------------|-----------|
| 0 | 135.0               | 26.0                      | 185.0                    | 175             | 75.0            | 1904.761905 | 0.352381                    | 1.14      |
| 1 | 110.0               | 23.0                      | 190.0                    | 200             | 50.0            | 2500.000000 | 0.475000                    | 1.14      |
| 2 | 135.0               | 26.0                      | 190.0                    | 175             | 50.0            | 2857.142857 | 0.542857                    | 1.14      |
| 3 | 145.0               | 27.0                      | 220.0                    | 100             | 100.0           | 2500.000000 | 0.550000                    | 1.14      |
| 4 | 130.0               | 26.0                      | 219.0                    | 95              | 95.0            | 2770.083102 | 0.606648                    | 1.14      |

```
In [ ]: data_final.tail()
```

| Out[ ]: | Average Voltage (V) | Average Pulse Length (us) | Average Drop Volume (pl) | Drop Pitch (um) | Line Pitch (um) | n° of drops | Total Volume Deposited (ul) | Amine (%) |
|---------|---------------------|---------------------------|--------------------------|-----------------|-----------------|-------------|-----------------------------|-----------|
| 226     | 155.000000          | 26.000000                 | 225.0                    | 50              | 80.0            | 6250.0      | 1.40625                     | 2.00      |
| 227     | 155.000000          | 26.000000                 | 225.0                    | 50              | 80.0            | 6250.0      | 1.40625                     | 2.00      |
| 228     | 155.000000          | 26.000000                 | 225.0                    | 50              | 80.0            | 6250.0      | 1.40625                     | 2.00      |
| 229     | 153.500000          | 25.500000                 | 238.0                    | 50              | 80.0            | 6250.0      | 1.48750                     | 2.00      |
| 230     | 149.873239          | 25.507042                 | 180.0                    | 50              | 50.0            | 10000.0     | 1.80000                     | 1.14      |

## Prediction of the variable Total Volume Deposited

We will build a machine learning model to predict the **Total Volume Deposited** by considering all the variables from the dataset.

### Select model variables and Train/Test split

We will select the variables used in the model, shuffle the data, and split the dataset into X and y. We split the data into train and test datasets by using the ratio 80:20.

```
In [ ]: def split_data(data, test_ratio):

    # Name dataset
    data_TVD = data_final

    # Shuffle the data
    data_TVD = shuffle(data_TVD, random_state = 42) # A random state was set to keep

    data_TVD.reset_index(inplace = True, drop = True)

    # Split the data set into X and y
    X_TVD = data_TVD.drop(labels=['Total Volume Deposited (ul)'], axis=1)
    y_TVD = data_TVD['Total Volume Deposited (ul)']

    # Split the training data into training and test sets (80:20)
    X_train_TVD, X_test_TVD, y_train_TVD, y_test_TVD = train_test_split(X_TVD,
                                                                           y_TVD,
                                                                           test_size=0.2, random_state = 42)

    return X_train_TVD, X_test_TVD, y_train_TVD, y_test_TVD

X_train_TVD, X_test_TVD, y_train_TVD, y_test_TVD = split_data(data_final, 0.2)

In [ ]: # Check the range of values from all columns
X_train_TVD.describe()
```

Out[ ]:

|              | Average Voltage (V) | Average Pulse Length (us) | Average Drop Volume (pl) | Drop Pitch (um) | Line Pitch (um) | n° of drops  | Amine (%)  |
|--------------|---------------------|---------------------------|--------------------------|-----------------|-----------------|--------------|------------|
| <b>count</b> | 184.000000          | 184.000000                | 184.000000               | 184.000000      | 184.000000      | 184.000000   | 184.000000 |
| <b>mean</b>  | 150.313036          | 25.571226                 | 203.336957               | 100.326087      | 67.562500       | 4976.595225  | 1.652391   |
| <b>std</b>   | 22.363363           | 1.031120                  | 19.421498                | 62.054112       | 25.930804       | 1224.097682  | 0.416547   |
| <b>min</b>   | 95.000000           | 20.000000                 | 140.000000               | 45.000000       | 20.000000       | 1904.761905  | 0.000000   |
| <b>25%</b>   | 136.000000          | 25.000000                 | 190.000000               | 50.000000       | 40.000000       | 3906.250000  | 1.140000   |
| <b>50%</b>   | 149.936620          | 25.507042                 | 205.000000               | 80.000000       | 80.000000       | 5000.000000  | 2.000000   |
| <b>75%</b>   | 155.000000          | 26.000000                 | 220.000000               | 160.000000      | 85.000000       | 5882.352941  | 2.000000   |
| <b>max</b>   | 234.000000          | 30.000000                 | 240.000000               | 250.000000      | 100.000000      | 10000.000000 | 2.300000   |

```
In [ ]: # Check the range of values from all columns
X_test_TVD.describe()
```

Out[ ]:

|              | Average Voltage (V) | Average Pulse Length (us) | Average Drop Volume (pl) | Drop Pitch (um) | Line Pitch (um) | n° of drops | Amine (%) |
|--------------|---------------------|---------------------------|--------------------------|-----------------|-----------------|-------------|-----------|
| <b>count</b> | 47.000000           | 47.000000                 | 47.000000                | 47.000000       | 47.000000       | 47.000000   | 47.000000 |
| <b>mean</b>  | 148.151483          | 25.255769                 | 202.957447               | 107.659574      | 63.191489       | 5044.874953 | 1.668085  |
| <b>std</b>   | 20.718978           | 1.272166                  | 19.617492                | 64.898341       | 27.295197       | 1219.078954 | 0.400166  |
| <b>min</b>   | 95.000000           | 20.000000                 | 165.000000               | 45.000000       | 20.000000       | 3246.753247 | 1.140000  |
| <b>25%</b>   | 137.500000          | 25.000000                 | 188.500000               | 50.000000       | 35.000000       | 3906.250000 | 1.140000  |
| <b>50%</b>   | 150.000000          | 25.500000                 | 202.500000               | 85.000000       | 75.000000       | 5000.000000 | 2.000000  |
| <b>75%</b>   | 157.500000          | 26.000000                 | 220.000000               | 160.000000      | 85.000000       | 6250.000000 | 2.000000  |
| <b>max</b>   | 233.000000          | 27.000000                 | 235.000000               | 245.000000      | 110.000000      | 7407.407407 | 2.300000  |

```
In [ ]: # Check the range of values from all columns
y_train_TVD.describe()
```

Out[ ]:

```
count    184.000000
mean      0.997871
std       0.203188
min       0.352381
25%      0.839844
50%      1.000000
75%      1.152941
max       1.800000
Name: Total Volume Deposited (ul), dtype: float64
```

```
In [ ]: # Check the range of values from all columns
y_test_TVD.describe()
```

```
Out[ ]: count    47.000000
        mean     1.007116
        std      0.189097
        min      0.714286
        25%      0.834961
        50%      0.989583
        75%      1.184028
        max      1.406250
Name: Total Volume Deposited (ul), dtype: float64
```

## Build models without hyperparameters

We will build the models with all default hyperparameters.

```
In [ ]: # Dictionary with models
models = {
    'Linear Regression': LinearRegression(),
    'Random Forest': RandomForestRegressor(),
    'AdaBoost Regressor': AdaBoostRegressor(),
    'Gradient Boosting': GradientBoostingRegressor()
}

# Create a function to fit and score models
def train_cross_val(models, X_train, y_train, score_name):

    # Set random seed
    np.random.seed(42)

    # Make a dictionary to keep model scores
    model_validation_scores = {}

    # K-Fold cross validation
    cv = KFold(n_splits = 5) # n_splits = 5 means 80:20 training:validation

    # Loop through models
    for name, model in models.items():
        # Fit the model to the training data
        model.fit(X_train, y_train)

        # Cross-validation
        model_validation_scores[name] = cross_validate(model, X_train, y_train,
                                                       cv = cv, scoring = score_name)

    return model_validation_scores
```

```
In [ ]: # Check scores
cross_val_scores = train_cross_val(models=models, X_train=X_train_TVD, y_train=y_train_TVD)
```

```
In [ ]: # Get values from each model
def get_dict_scores():

    # Define empty dictionaries
    train_score = {}
    test_score = {}

    # Loop through score dictionary values
    for k1, v1 in cross_val_scores.items():
        for k2, v2 in v1.items():
            if k2 == 'train_score':
                v2 = np.mean(v2)
                train_score[k1] = abs(v2)
            elif k2 == 'test_score':
```

```

        v2 = np.mean(v2)
        test_score[k1] = abs(v2)

    return train_score, test_score

```

```

In [ ]: # Define function to merge scores and create a dataframe
def merge_scores():

    dict_scores = get_dict_scores()
    train_score = dict_scores[0]
    test_score = dict_scores[1]

    # Create a data frame with the scores from the train_score dictionary
    train_df = pd.DataFrame.from_dict(train_score, orient='index')
    train_df.reset_index(inplace = True)
    train_df = train_df.rename(columns = {'index': 'Models', 0: 'Avg. Score'})

    # Create a data frame with the scores from the test_score dictionary
    test_df = pd.DataFrame.from_dict(test_score, orient='index')
    test_df.reset_index(inplace = True)
    test_df = test_df.rename(columns = {'index': 'Models', 0: 'Avg. Score'})

    # Merge both dataframes
    df = pd.merge(train_df, test_df[['Models', 'Avg. Score']], on='Models', how='left')
    df = df.rename(columns = {'Avg. Score_x': 'Train Avg. Score', 'Avg. Score_y':
                               'Test Avg. Score'})

    # Melt dictionary by Models column
    model_compare = df.melt(id_vars = 'Models')
    model_compare = model_compare.rename(columns = {'variable': 'Score', 'value':
                                                    'Value'})

    return model_compare

merge_scores()

```

```

Out[ ]:

```

|   | Models             | Score            | Value    |
|---|--------------------|------------------|----------|
| 0 | Linear Regression  | Train Avg. Score | 0.989216 |
| 1 | Random Forest      | Train Avg. Score | 0.990853 |
| 2 | AdaBoost Regressor | Train Avg. Score | 0.954111 |
| 3 | Gradient Boosting  | Train Avg. Score | 0.999158 |
| 4 | Linear Regression  | Test Avg. Score  | 0.987991 |
| 5 | Random Forest      | Test Avg. Score  | 0.933515 |
| 6 | AdaBoost Regressor | Test Avg. Score  | 0.886726 |
| 7 | Gradient Boosting  | Test Avg. Score  | 0.960391 |

## Figure S10

```

In [ ]: def plot_scores():

    # Call the merge_scores function
    model_compare = merge_scores()

    # Plot the scores
    fig, ax = plt.subplots(figsize=(7,5))

    sns.barplot(x = 'Models', y = 'Value', data = model_compare, hue = 'Score', pa

```

```

plt.xticks(fontsize=20, rotation=90);
plt.xlabel("", fontsize=20);
plt.yticks(fontsize=18);
plt.ylabel(r"$R^2$", fontsize=20);

plt.ylim([0, 1.1])
plt.yticks(np.arange(0, 1.2, 0.2))

model_names = ['Linear \nRegression', 'Random \nForest', 'AdaBoost \nRegressor']
ax.set_xticklabels(model_names)

plt.legend(prop={"size":16}, loc = 4)

x_offset = 0.00
y_offset = 0.00

for p in ax.patches:
    ax.annotate(str(round(p.get_height(),2)), (p.get_x() + 0.02, p.get_height()

return plt.show()

plot_scores()

```

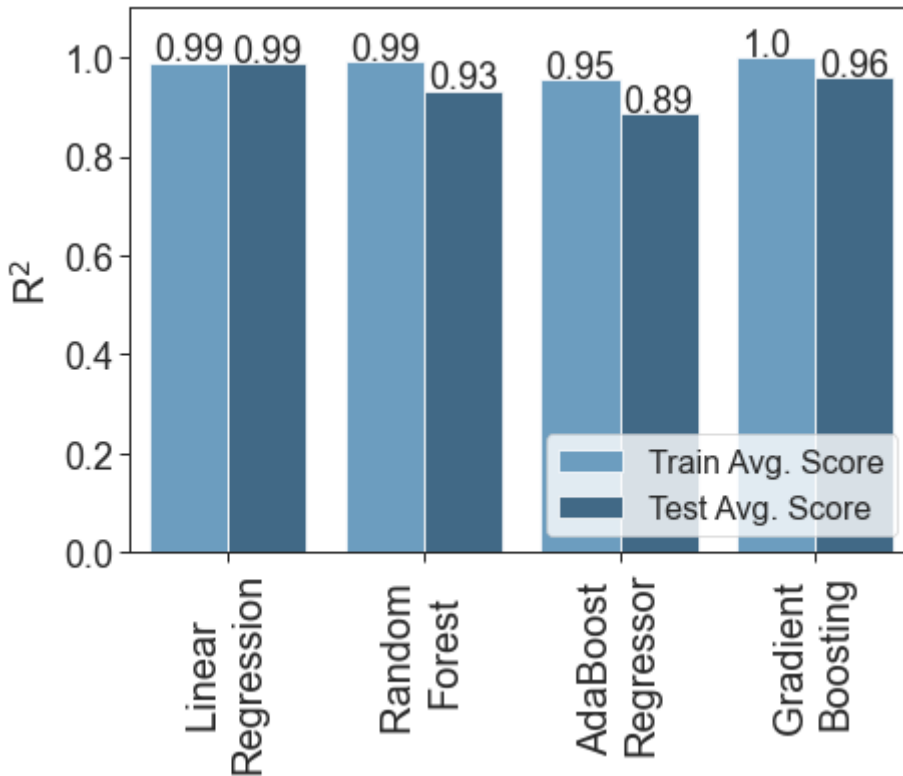

## Evaluation function to calculate different error metrics

```

In [ ]: # Create function to evaluate our model
def show_scores(model, X_train, X_test, y_train, y_test):
    train_preds = model.predict(X_train)
    val_preds = model.predict(X_test)
    scores = {"Train MSE": mean_squared_error(y_train, train_preds, squared=True),
             "Test MSE": mean_squared_error(y_test, val_preds, squared=True),
             "Train RMSE": mean_squared_error(y_train, train_preds, squared=False),
             "Test RMSE": mean_squared_error(y_test, val_preds, squared=False),
             "Train R^2": model.score(X_train, y_train),
             "Test R^2": model.score(X_test, y_test)}
    return scores

```

## Optimizing the Random Forest Regressor

We will optimize the hyperparameters for the Random Forest Regressor model, as well as explore the evolution of different metrics.

### Number of estimators

Here, we will plot the evolution of the RMSE and  $R^2$  as a function of the  $n\_estimators$ ,  $min\_sample\_split$  and  $max\_depth$  parameters.

```
In [ ]: # Function to evaluate the hyperparameters for the number of trees
def n_trees_tuning(X_train, y_train, n_trees, tree_step, cross_val):

    ### Iterate over the number of estimators in the Random Forest

    # Create a List to store the metrics
    index_estimators = []
    r2_estimators = []
    rmse_estimators = []

    cv = KFold(n_splits = cross_val) # n_splits = 5 means 80:20 training:validation

    # Iterate over a hyperparameter
    for i in np.arange(0, n_trees, tree_step):
        test_model_rf_NOD = RandomForestRegressor(n_estimators = i,
                                                min_samples_leaf = 1,
                                                min_samples_split = 3,
                                                max_features = 'auto',
                                                max_depth = 10,
                                                max_samples = None,
                                                random_state = 42)

        val_scores_r2 = cross_val_score(test_model_rf_NOD, X_train, y_train, cv = cv,
                                       scoring = 'r2')
        val_scores_rmse = cross_val_score(test_model_rf_NOD, X_train, y_train, cv = cv,
                                         scoring = 'neg_root_mean_squared_error')

        # Store the scores in a list
        index_estimators.append(i)
        r2_estimators.append(val_scores_r2.mean())
        rmse_estimators.append(val_scores_rmse.mean())

    return index_estimators, r2_estimators, rmse_estimators
```

```
In [ ]: index_estimators, r2_estimators, rmse_estimators = n_trees_tuning(X_train_TVD, y_train_TVD, n_trees, tree_step, cross_val)
```

```
In [ ]: # Create a dataframe with the number of estimators
rf_estimators_TVD = pd.DataFrame(
    {
        'Nº of Estimators': index_estimators,
        'R2 validation': r2_estimators,
        'RMSE validation': rmse_estimators
    }
)

# Convert negative RMSE to positive
rf_estimators_TVD['RMSE validation'] = rf_estimators_TVD['RMSE validation'].abs()
```

```
In [ ]: # Function to evaluate the hyperparameters for the number of trees
def split_tuning(X_train, y_train, min_split, split_step, cross_val):
```



```

### Iterate over the min_sample_split in the Random Forest

# Create a List to store the metrics
index_min_sample = []
rmse_min_sample = []
r2_min_sample = []

cv = KFold(n_splits = cross_val) # n_splits = 5 means 80:20 training:validation

# Iterate over a hyperparameter
for i in np.arange(2, min_split, split_step):
    test_model_rf_NOD = RandomForestRegressor(n_estimators = 30,
                                             min_samples_leaf = 1,
                                             min_samples_split = i,
                                             max_features = 'auto',
                                             max_depth = 10,
                                             max_samples = None,
                                             random_state = 42)

    val_scores_r2_min_sample = cross_val_score(test_model_rf_NOD, X_train, y_train,
                                              cv = cv, scoring = 'r2')
    val_scores_rmse_min_sample = cross_val_score(test_model_rf_NOD, X_train, y_train,
                                              cv = cv, scoring = 'neg_root_mean_squared_error')

    # Store the scores in a list
    index_min_sample.append(i)
    r2_min_sample.append(val_scores_r2_min_sample.mean())
    rmse_min_sample.append(val_scores_rmse_min_sample.mean())

return index_min_sample, r2_min_sample, rmse_min_sample

```

```
In [ ]: index_min_sample, r2_min_sample, rmse_min_sample = split_tuning(X_train_TVD, y_train_TVD)
```

```
In [ ]: # Create a dataframe with the min_sample_split
rf_split_TVD = pd.DataFrame(
    {
        'Minimum Sample Split': index_min_sample,
        'R2 validation': r2_min_sample,
        'RMSE validation': rmse_min_sample
    }
)

# Convert negative RMSE to positive
rf_split_TVD['RMSE validation'] = rf_split_TVD['RMSE validation'].abs()

```

```
In [ ]: # Function to evaluate the hyperparameters for the number of trees
def depth_tuning(X_train, y_train, depth, depth_step, cross_val):
    ### Iterate over the max_depth in the Random Forest

    # Create a List to store the metrics
    index_depth = []
    rmse_depth = []
    r2_depth = []

    cv = KFold(n_splits = cross_val) # n_splits = 5 means 80:20 training:validation

    # Iterate over a hyperparameter
    for i in np.arange(2, depth, depth_step):
        test_model_rf_NOD = RandomForestRegressor(n_estimators = 30,
                                                 min_samples_leaf = 1,
                                                 min_samples_split = 3,
                                                 max_features = 'auto',
                                                 max_depth = i,

```

```

        max_samples = None,
        random_state = 42)
    val_scores_r2_depth = cross_val_score(test_model_rf_NOD, X_train, y_train,
                                         cv = cv, scoring = 'r2')
    val_scores_rmse_depth = cross_val_score(test_model_rf_NOD, X_train, y_train,
                                           cv = cv, scoring = 'neg_root_mean_sq

    # Store the scores in a list
    index_depth.append(i)
    r2_depth.append(val_scores_r2_depth.mean())
    rmse_depth.append(val_scores_rmse_depth.mean())

    return index_depth, r2_depth, rmse_depth

```

```
In [ ]: index_depth, r2_depth, rmse_depth = depth_tuning(X_train_TVD, y_train_TVD, depth=20)
```

```
In [ ]: # Create a dataframe with the max_depth
rf_depth_TVD = pd.DataFrame(
    {
        'Maximum Depth': index_depth,
        'R2 validation': r2_depth,
        'RMSE validation': rmse_depth
    }
)

# Convert negative RMSE to positive
rf_depth_TVD['RMSE validation'] = rf_depth_TVD['RMSE validation'].abs()

```

## Figure S11

```
In [ ]: # Define the grid
fig, axs = plt.subplots(nrows = 1, ncols = 3, figsize=(14,4))

# Plot the different metrics as a function of the number of estimators
g1_rmse_scatter = sns.scatterplot(x = 'Nº of Estimators', y = 'RMSE validation', s=70,
                                 color = 'steelblue', data = rf_estimators_TVD, ax = axs[0])
g1_rmse_line = sns.lineplot(x = 'Nº of Estimators', y = 'RMSE validation', linewidth=2,
                            color = 'steelblue', data = rf_estimators_TVD, ax = axs[0])

# Twin object for two different y-axis on the sample plot axs[0]
ax1_twin=axs[0].twinx()

g1_r2_scatter = sns.scatterplot(x = 'Nº of Estimators', y = 'R2 validation', s=70,
                                color = 'chocolate', data = rf_estimators_TVD, ax = axs[0])
g1_r2_line = sns.lineplot(x = 'Nº of Estimators', y = 'R2 validation', linewidth=2,
                          color = 'chocolate', data = rf_estimators_TVD, ax = ax1_twin)

# Plot the different metrics as a function of the minimum sample split
g2_rmse_scatter = sns.scatterplot(x = 'Minimum Sample Split', y = 'RMSE validation', s=70,
                                  color = 'steelblue', data = rf_split_TVD, ax = axs[1])
g2_rmse_line = sns.lineplot(x = 'Minimum Sample Split', y = 'RMSE validation', linewidth=2,
                             color = 'steelblue', data = rf_split_TVD, ax = axs[1])

# Twin object for two different y-axis on the sample plot axs[1]
ax2_twin=axs[1].twinx()

g2_r2_scatter = sns.scatterplot(x = 'Minimum Sample Split', y = 'R2 validation', s=70,
                                color = 'chocolate', data = rf_split_TVD, ax = axs[1])
g2_r2_line = sns.lineplot(x = 'Minimum Sample Split', y = 'R2 validation', linewidth=2,
                          color = 'chocolate', data = rf_split_TVD, ax = ax2_twin)

# Plot the different metrics as a function of the maximum depth

```

```

g3_rmse_scatter = sns.scatterplot(x = 'Maximum Depth', y = 'RMSE validation', s=70,
                                color = 'steelblue', data = rf_depth_TVD, ax = ax3)
g3_rmse_line = sns.lineplot(x = 'Maximum Depth', y = 'RMSE validation', linewidth = 2,
                            color = 'steelblue', data = rf_depth_TVD, ax = ax3)

# Twin object for two different y-axis on the sample plot axs[2]
ax3_twin=axs[2].twinx()

g3_r2_scatter = sns.scatterplot(x = 'Maximum Depth', y = 'R2 validation', s=70,
                                color = 'chocolate', data = rf_depth_TVD, ax = ax3)
g3_r2_line = sns.lineplot(x = 'Maximum Depth', y = 'R2 validation', linewidth = 2,
                            color = 'chocolate', data = rf_depth_TVD, ax = ax3_twin)

### Customize the axs[0] plot

# Customize the RMSE plot
axs[0].set_xlabel('N° of estimators', fontsize = 20)
axs[0].set_ylabel('RMSE', fontsize = 20, color = 'steelblue')
axs[0].tick_params(labelsize = 18)
axs[0].set_xlim([0, 500])
axs[0].set_ylim([0.048, 0.056])
axs[0].set_xticks(np.arange(0, 510, 100))
axs[0].set_yticks(np.arange(0.048, 0.06, 0.002))
axs[0].spines['left'].set_color('steelblue')
axs[0].tick_params(axis='y', colors='steelblue')

# Customize the R2 plot
ax1_twin.set_ylabel(r'R$^2$', fontsize = 20, color = 'chocolate')
ax1_twin.tick_params(axis = 'y', labelsize = 18)
ax1_twin.set_ylim([0.915, 0.94])
ax1_twin.set_yticks(np.arange(0.915, 0.945, 0.005))
ax1_twin.spines['right'].set_color('chocolate')
ax1_twin.tick_params(axis='y', colors='chocolate')

### Customize the axs[1] plot

# Customize the RMSE plot
axs[1].set_xlabel('Minimum Sample Split', fontsize = 20)
axs[1].set_ylabel('RMSE', fontsize = 20, color = 'steelblue')
axs[1].tick_params(labelsize = 18)
axs[1].set_xlim([1, 11])
axs[1].set_ylim([0.048, 0.059])
axs[1].set_xticks(np.arange(1, 12, 1))
axs[1].set_yticks(np.arange(0.048, 0.06, 0.002))
axs[1].spines['left'].set_color('steelblue')
axs[1].tick_params(axis='y', colors='steelblue')

# Customize the R2 plot
ax2_twin.set_ylabel(r'R$^2$', fontsize = 20, color = 'chocolate')
ax2_twin.tick_params(axis = 'y', labelsize = 18, color = 'chocolate')
ax2_twin.set_ylim([0.91, 0.94])
ax2_twin.set_yticks(np.arange(0.91, 0.945, 0.005))
ax2_twin.spines['right'].set_color('chocolate')
ax2_twin.tick_params(axis='y', colors='chocolate')

### Customize the axs[2] plot

# Customize the RMSE plot
axs[2].set_xlabel('Maximum Depth', fontsize = 20)
axs[2].set_ylabel('RMSE', fontsize = 20, color = 'steelblue')
axs[2].tick_params(labelsize = 18)
axs[2].set_xlim([1, 20])
axs[2].set_ylim([0.04, 0.105])
axs[2].set_xticks(np.arange(1, 21, 2))

```

```

axs[2].set_yticks(np.arange(0.04, 0.105, 0.005))
axs[2].spines['left'].set_color('steelblue')
axs[2].tick_params(axis='y', colors='steelblue')

# Customize the R2 plot
ax3_twin.set_ylabel(r'$R^2$', fontsize = 20, color = 'chocolate')
ax3_twin.tick_params(axis = 'y', labelsiz e = 18, color = 'chocolate')
ax3_twin.set_ylim([0.75, 0.95])
ax3_twin.set_yticks(np.arange(0.75, 0.96, 0.05))
ax3_twin.spines['right'].set_color('chocolate')
ax3_twin.tick_params(axis='y', colors='chocolate')

# Figure Labels
fig.text(-0.003, 1.35, '(a)', va='center', rotation='horizontal', fontsize = 20)
fig.text(0.46, 1.35, '(b)', va='center', rotation='horizontal', fontsize = 20)
fig.text(0.925, 1.35, '(c)', va='center', rotation='horizontal', fontsize = 20)

# set the spacing between subplots
plt.subplots_adjust(left=0.0,
                    bottom=0.0,
                    right=0.9,
                    top=0.9,
                    wspace=2.5,
                    hspace=0.5)

plt.tight_layout(rect=(0, 0, 1.4, 1.4));

```

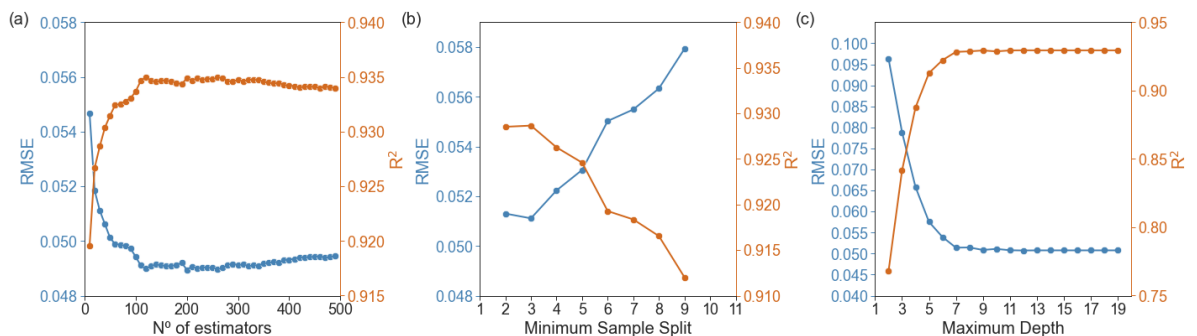

## Train a model with the best parameters

The Random Forest will be trained on the best parameters to calculate the values of the evaluation metrics. Then, it will be fit to the whole train set and evaluated to a final test set.

```

In [ ]: %time
cv = KFold(n_splits = 5) # n_splits = 5 means 80:20 training:validation

# Most ideal hyperparameters
ideal_model_rf_TVD = RandomForestRegressor(n_estimators = 120,
                                          min_samples_leaf = 1,
                                          min_samples_split = 3,
                                          max_features = 'auto',
                                          max_depth = 10,
                                          max_samples = None,
                                          random_state = 42)

val_scores_r2 = cross_validate(ideal_model_rf_TVD, X_train_TVD, y_train_TVD,
                               cv = cv, scoring = 'r2', return_train_score = True)
val_scores_rmse = cross_validate(ideal_model_rf_TVD, X_train_TVD, y_train_TVD,
                                 cv = cv, scoring = 'neg_root_mean_squared_error',

# Scores

```

```
val_scores_r2
val_scores_rmse
```

```
CPU times: total: 1.69 s
```

```
Wall time: 1.74 s
```

```
Out[ ]: {'fit_time': array([0.14860272, 0.14261889, 0.15458679, 0.14659548, 0.15857768]),
'score_time': array([0.01097012, 0.01096988, 0.0119679 , 0.01198745, 0.0109703
5]),
'test_score': array([-0.04035831, -0.02788103, -0.08971016, -0.0358721 , -0.05108
857]),
'train_score': array([-0.02077078, -0.02049286, -0.0156528 , -0.0239474 , -0.0210
2809])}
```

## Calculate mean value of R2

```
In [ ]: # Train score
val_scores_r2['train_score'].mean()
```

```
Out[ ]: 0.9897566797134786
```

```
In [ ]: # Validation score
val_scores_r2['test_score'].mean()
```

```
Out[ ]: 0.9349832073334448
```

## Calculate mean value of RMSE

```
In [ ]: # Train score
abs(val_scores_rmse['train_score'].mean())
```

```
Out[ ]: 0.020378387569141506
```

```
In [ ]: # Validation score
abs(val_scores_rmse['test_score'].mean())
```

```
Out[ ]: 0.04898203686734022
```

## Fit the model on the whole training set and calculate the scores for the test set

```
In [ ]: # Fit the ideal model on the whole training set
ideal_model_rf_TVD.fit(X_train_TVD, y_train_TVD)

# Calculate the scores for the test set
ideal_scores_TVD = show_scores(ideal_model_rf_TVD, X_train_TVD, X_test_TVD, y_train_TVD)
ideal_scores_TVD
```

```
Out[ ]: {'Train MSE': 0.0004306294104637352,
'Test MSE': 0.0006719451266191936,
'Train RMSE': 0.020751612237696983,
'Test RMSE': 0.02592190437871403,
'Train R^2': 0.9895124495083429,
'Test R^2': 0.9807997815771013}
```

The scores for the train set shown here correspond to the ones for the whole set without cross-validation.

## Predictions with the optimized model and graphical representation

```
In [ ]: # Make predictions on test data and save them
y_preds_rf_TVD = ideal_model_rf_TVD.predict(X_test_TVD)

# View predictions
y_preds_rf_TVD
```

```
Out[ ]: array([0.90299627, 1.13915195, 1.02786235, 1.21174913, 1.04991181,
        1.12238724, 0.7401665 , 0.83009169, 1.23507004, 1.28731813,
        1.05717336, 1.17993053, 1.2703229 , 0.73406211, 0.839898 ,
        1.17465022, 0.91298685, 1.20262267, 0.96929794, 0.85921224,
        0.93264768, 0.83009169, 0.80354471, 1.21427637, 1.30197885,
        1.40994589, 0.9004008 , 0.96935473, 1.00062976, 0.98339192,
        0.74525806, 0.85650725, 0.80354471, 0.97980494, 1.05702306,
        1.11782456, 1.242989 , 0.7165456 , 0.81265835, 1.22776114,
        0.88919639, 1.14475696, 0.74862447, 1.20509222, 1.21984571,
        0.80354471, 0.95336925])
```

```
In [ ]: # Plot Y-train vs Y-preds for RFR
fig, ax = plt.subplots(figsize=(9, 7))

sns.regplot(x = y_test_TVD,
            y= y_preds_rf_TVD, scatter_kws={"color":"steelblue","alpha":0.3,"s":100},
            line_kws={"color":"black","alpha":0.7,"lw":3});

ax.tick_params(labelsize=18)
ax.set_xlabel(r"Experimental Total Volume Deposited /  $\mu\text{l}$ ", fontsize=22)
ax.set_ylabel(r"Predicted Total Volume Deposited /  $\mu\text{l}$ ", fontsize=22)

plt.xticks(np.arange(0.6, 1.6, 0.1))
plt.yticks(np.arange(0.6, 1.6, 0.1))
plt.xlim([0.6, 1.5])
plt.ylim([0.6, 1.5])
```

```
Out[ ]: (0.6, 1.5)
```

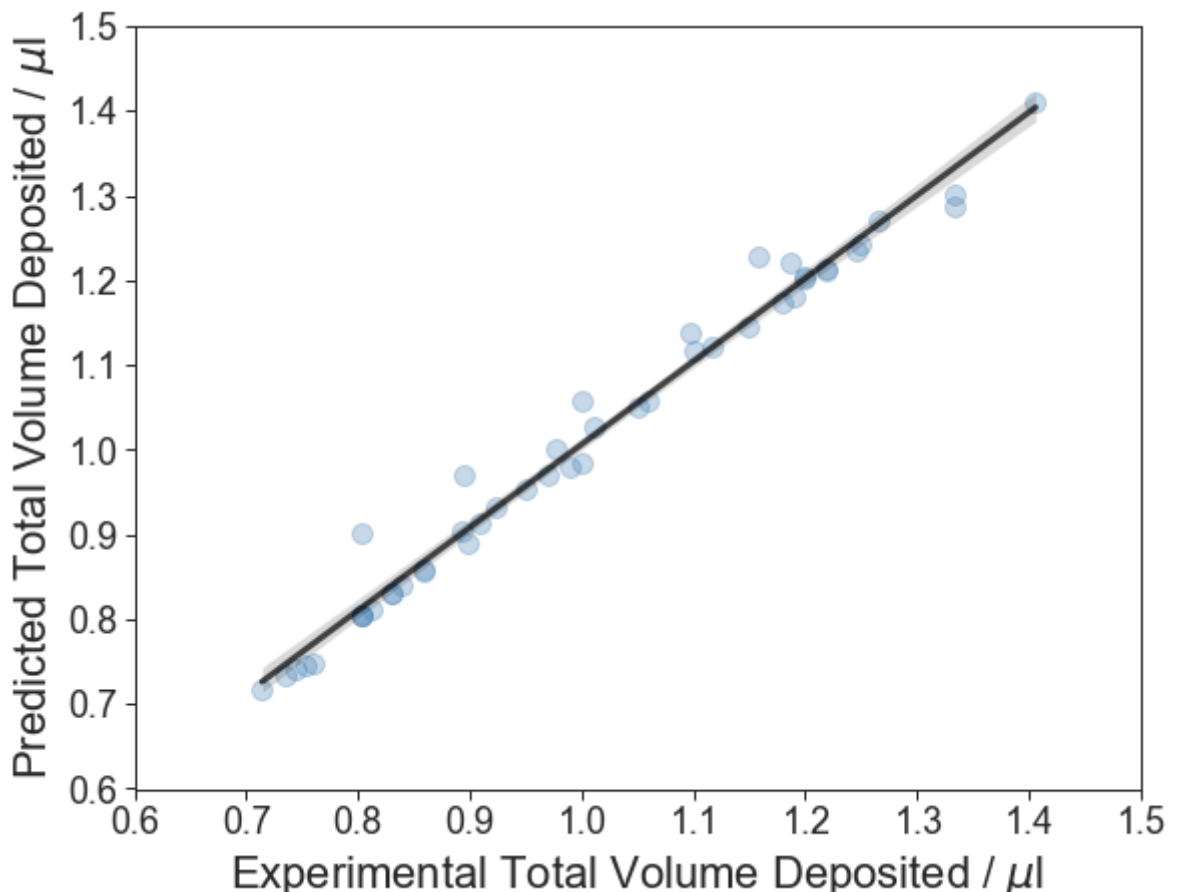

The above plot with the results from the predictions vs the experimentally determined Total Deposited Volume shows that the model can predict with high accuracy the experimental values, as expected due to the high accuracy obtained.

## Calculation of the variable importance

We will plot the variable importance which lists the variables of the model by order of importance in descending order. The top variables contribute more to the model than the bottom ones and thus have high predictive power. The SHAP library is being used to calculate it, and it is based on the mean absolute value of the SHAP values for each feature.

Check <https://github.com/slundberg/shap> for details on the implementation of the SHAP library.

## Figure 6a

```
In [ ]: # Explain the model's predictions using SHAP
explainer = shap.TreeExplainer(ideal_model_rf_TVD)
shap_values = explainer.shap_values(X_train_TVD)

# Create dataframe with SHAP values
shap_df = pd.DataFrame(shap_values, columns = X_test_TVD.columns)

# Calculate the average value of the absolute SHAP values for each feature
avg_values = shap_df.apply(lambda x: x.abs().mean(), axis = 0)

# Calculate the percentages
avg_values_percentage = (avg_values/avg_values.sum()) * 100
avg_values_percentage.sort_values(ascending = False, inplace = True)

# Plot the SHAP values
sns.barplot(x = avg_values_percentage, y = avg_values_percentage.index, palette = 'magma')

# Customize the plot
fig = plt.gcf()
fig.set_figheight(8)
fig.set_figwidth(10)
ax = plt.gca()
ax.set_xlabel('Influence in the model / %', fontsize=26)
ax.tick_params(labelsize=24)
ax.set_xlim([0, 80])

var_shap = ['Nº of Drops (NoD)', 'Average Drop Volume (ADV) / pl', r'Line Pitch (d) / $\\mu$m',
           r'Drop Pitch (dx) / $\\mu$m', r'Average Pulse Length (APL) / $\\mu$s',
           'Amine / %', 'Average Voltage (AV) / V']

ax.set_yticklabels(var_shap)

# Add annotations
for p in ax.patches:
    ax.annotate(str(round(p.get_width(),1)), xy = (p.get_width()+1, p.get_y() + p.get_height()))

plt.show()
```

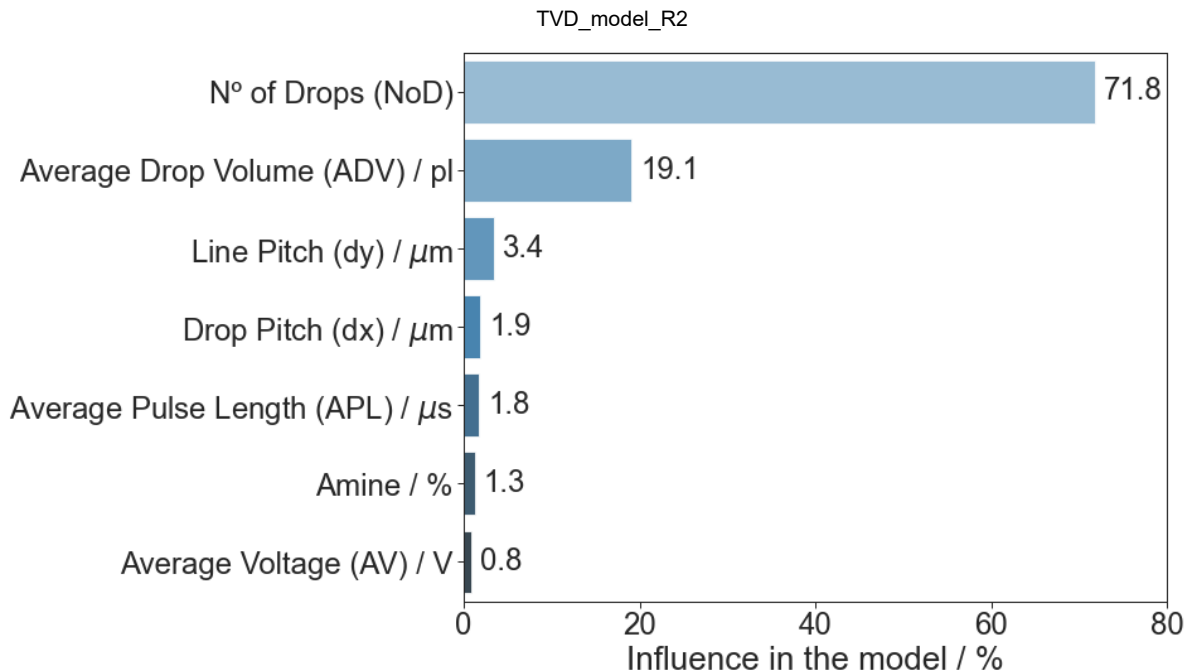

Variable importance shows that the N° of drops and average drop volume are the most important variables contributing in building the model, while the remaining variables have very little influence in the model and could be discarded from the model without affecting too much its predictive power.

## Prediction of the variable **Total Volume Deposited** by dropping unimportant features

We will remove the previous unimportant variables from the model to determine how the accuracy and RMSE vary.

```
In [ ]: # Drop columns from train and test sets
X_train_TVD_reduced = X_train_TVD.drop(labels=[
    'Average Voltage (V)', 'Average Pulse Length (us)',
    'Drop Pitch (um)', 'Line Pitch (um)'
], axis=1, inplace=False)

X_test_TVD_reduced = X_test_TVD.drop(labels=[
    'Average Voltage (V)', 'Average Pulse Length (us)',
    'Drop Pitch (um)', 'Line Pitch (um)'
], axis=1, inplace=False)
```

## Train a new model with the reduced dataset

We will train a RF model with the reduced dataset

```
In [ ]: %%time
cv = KFold(n_splits = 5) # n_splits = 5 means 80:20 training:validation

# Most ideal hyperparameters
ideal_model_rf_TVD_reduced = RandomForestRegressor(n_estimators = 120,
    min_samples_leaf = 1,
    min_samples_split = 3,
    max_features = 'auto',
    max_depth = 10,
    max_samples = None,
    random_state = 42)
```



```

ideal_model_rf_TVD_reduced.fit(X_train_TVD_reduced, y_train_TVD)

val_scores_r2_reduced = cross_validate(ideal_model_rf_TVD_reduced, X_train_TVD_reduced,
                                       y_train_TVD, cv = cv, scoring = 'r2', return_train_score = True)
val_scores_rmse_reduced = cross_validate(ideal_model_rf_TVD_reduced, X_train_TVD_reduced,
                                         y_train_TVD, cv = cv, scoring = 'neg_root_mean_squared_error',
                                         return_train_score = True)

# Scores
val_scores_r2_reduced
val_scores_rmse_reduced

```

CPU times: total: 1.75 s

Wall time: 1.75 s

```

Out[ ]: {'fit_time': array([0.14612103, 0.13917112, 0.14212775, 0.14113092, 0.12785721]),
        'score_time': array([0.01196742, 0.01297116, 0.01196766, 0.01097035, 0.00997281]),
        'test_score': array([-0.02551712, -0.02361607, -0.07968134, -0.02450029, -0.0413976 ]),
        'train_score': array([-0.0180293 , -0.01782074, -0.0127044 , -0.02054952, -0.01817215])}

```

## Calculate mean value of R2

```

In [ ]: # Train score
val_scores_r2_reduced['train_score'].mean()

```

```

Out[ ]: 0.9924591190019584

```

```

In [ ]: # Validation score
val_scores_r2_reduced['test_score'].mean()

```

```

Out[ ]: 0.9567293713442984

```

## Calculate mean value of RMSE

```

In [ ]: # Train score
abs(val_scores_rmse_reduced['train_score'].mean())

```

```

Out[ ]: 0.01745522148464957

```

```

In [ ]: # Validation score
abs(val_scores_rmse_reduced['test_score'].mean())

```

```

Out[ ]: 0.03894248535911965

```

```

In [ ]: scores_TVD_reduced = show_scores(ideal_model_rf_TVD_reduced, X_train_TVD_reduced, y_train_TVD, y_test_TVD)
scores_TVD_reduced

```

```

Out[ ]: {'Train MSE': 0.0003150890671527711,
        'Test MSE': 0.00046144357239286116,
        'Train RMSE': 0.017750748354724965,
        'Test RMSE': 0.021481237682984218,
        'Train R^2': 0.9923263195201293,
        'Test R^2': 0.9868146712747772}

```

## Plot model accuracy and RMSE for full dataset vs reduced dataset

```

In [ ]: ideal_scores_TVD

```

```
Out[ ]: {'Train MSE': 0.0004306294104637352,
        'Test MSE': 0.0006719451266191936,
        'Train RMSE': 0.020751612237696983,
        'Test RMSE': 0.02592190437871403,
        'Train R^2': 0.9895124495083429,
        'Test R^2': 0.9807997815771013}
```

```
In [ ]: # Create dataframe with scores from full dataset
ideal_scores_TVD_df = pd.DataFrame.from_dict(ideal_scores_TVD, orient = 'index', co
ideal_scores_TVD_df.reset_index(drop = False, inplace = True)
ideal_scores_TVD_df = ideal_scores_TVD_df.rename(columns = {'index':'Metric'})
ideal_scores_TVD_df.drop([ideal_scores_TVD_df.index[0], ideal_scores_TVD_df.index[
ideal_scores_TVD_df.reset_index(drop = True, inplace = True)
```

```
In [ ]: ideal_scores_TVD_df
```

```
Out[ ]:
```

|   | Metric     | Value    |
|---|------------|----------|
| 0 | Train RMSE | 0.020752 |
| 1 | Test RMSE  | 0.025922 |
| 2 | Train R^2  | 0.989512 |
| 3 | Test R^2   | 0.980800 |

```
In [ ]: # Create dataframe with scores from reduced dataset
reduced_scores_TVD_df = pd.DataFrame.from_dict(scores_TVD_reduced, orient = 'index
reduced_scores_TVD_df.reset_index(drop = False, inplace = True)
reduced_scores_TVD_df = reduced_scores_TVD_df.rename(columns = {'index':'Metric'})
reduced_scores_TVD_df.drop([reduced_scores_TVD_df.index[0], reduced_scores_TVD_df.
reduced_scores_TVD_df.reset_index(drop = True, inplace = True)
```

```
In [ ]: reduced_scores_TVD_df
```

```
Out[ ]:
```

|   | Metric     | Value    |
|---|------------|----------|
| 0 | Train RMSE | 0.017751 |
| 1 | Test RMSE  | 0.021481 |
| 2 | Train R^2  | 0.992326 |
| 3 | Test R^2   | 0.986815 |

```
In [ ]: # Concatenate dataframes
concat_scores_TVD = pd.concat([ideal_scores_TVD_df, reduced_scores_TVD_df])
concat_scores_TVD.reset_index(drop=True, inplace = True)

# Separate dataframe in two and add column based on Full or Reduced dataset
concat_scores_TVD_rmse = concat_scores_TVD.loc[concat_scores_TVD['Metric'].isin(['
concat_scores_TVD_rmse.reset_index(drop=True, inplace = True)
concat_scores_TVD_rmse['Dataset'] = ['Full', 'Full', 'Reduced', 'Reduced']

concat_scores_TVD_r2 = concat_scores_TVD.loc[concat_scores_TVD['Metric'].isin(['Tr
concat_scores_TVD_r2.reset_index(drop=True, inplace = True)
concat_scores_TVD_r2['Dataset'] = ['Full', 'Full', 'Reduced', 'Reduced']
```

## Figure S12

```
In [ ]: # Plot the RMSE and R2 for both datasets
```

```

fig, axes = plt.subplots(nrows = 1, ncols = 2, figsize=(9,3.5))

g1 = sns.barplot(x = 'Metric', y = 'Value', palette = 'Blues_d', hue = 'Dataset',
                 data = concat_scores_TVD_rmse, ax = axes[0])
g2 = sns.barplot(x = 'Metric', y = 'Value', palette = 'Blues_d', hue = 'Dataset',
                 data = concat_scores_TVD_r2, ax = axes[1])

### Customize the axes[0] plot
# Customize the RMSE plot
axes[0].set_xlabel('', fontsize = 20)
axes[0].set_ylabel('Value', fontsize = 20)
axes[0].tick_params(labelsizes = 18)
axes[0].legend(prop={"size":16}, loc = 0)

### Customize the axes[1] plot
# Customize the R2 plot
axes[1].set_xlabel('', fontsize = 20)
axes[1].set_ylabel('Value', fontsize = 20)
axes[1].tick_params(labelsizes = 18)
axes[1].legend(prop={"size":16}, loc = 4)

for p in g1.patches:
    g1.annotate(str(round(p.get_height(),3)), (p.get_x() + 0.1, p.get_height() - 0.005),
               fontsize = 18, color = 'white')

for p in g2.patches:
    g2.annotate(str(round(p.get_height(),2)), (p.get_x() + 0.12, p.get_height() - 0.005),
               fontsize = 18, color = 'white')

# Figure Labels
fig.text(-0.003, 1.35, '(a)', va='center', rotation='horizontal', fontsize = 20)
fig.text(0.705, 1.35, '(b)', va='center', rotation='horizontal', fontsize = 20)

x_offset = 0.00
y_offset = 0.00

# set the spacing between subplots
plt.subplots_adjust(left=0.0,
                   bottom=0.0,
                   right=0.9,
                   top=0.9,
                   wspace=2,
                   hspace=0.5)

plt.tight_layout(rect=(0, 0, 1.4, 1.4));

```

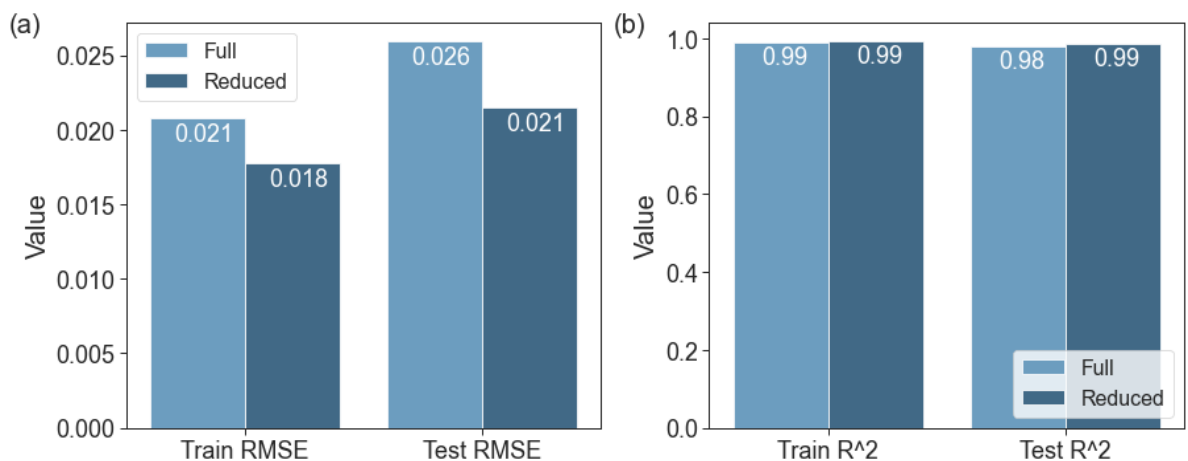

## Predictions of the reduced dataset for the TVD model

```
In [ ]: # Make predictions on test data and save them
y_preds_rf_TVD_reduced = ideal_model_rf_TVD_reduced.predict(X_test_TVD_reduced)

# View predictions
y_preds_rf_TVD_reduced
```

```
Out[ ]: array([0.89975078, 1.14325529, 0.99031275, 1.21691812, 1.04993403,
        1.10985636, 0.73910547, 0.8296441 , 1.26106493, 1.31451389,
        1.02157275, 1.16904053, 1.27855494, 0.73099145, 0.83984375,
        1.16904053, 0.90996272, 1.20161478, 0.97026448, 0.859375 ,
        0.92412502, 0.8296441 , 0.80253011, 1.20021023, 1.30914931,
        1.41077922, 0.89898887, 0.97247138, 0.98740054, 0.9847513 ,
        0.7468589 , 0.859375 , 0.80253011, 0.97970829, 1.05983791,
        1.10671667, 1.24349646, 0.71733565, 0.8135347 , 1.17448074,
        0.89071549, 1.14551367, 0.7550173 , 1.20161478, 1.19758434,
        0.80253011, 0.95137113])
```

## Figure 6b

```
In [ ]: # Plot Y-train vs Y-preds for RFR
fig, ax = plt.subplots(figsize=(9, 7))

sns.regplot(x = y_test_TVD,
            y = y_preds_rf_TVD, scatter_kws={"color":"darkred","alpha":0.3,"s":100},
            line_kws={"color":"darkred","alpha":0.5,"lw":3}, label = 'All variables')
sns.regplot(x = y_test_TVD,
            y = y_preds_rf_TVD_reduced, scatter_kws={"color":"steelblue","alpha":0.3,"s":100},
            line_kws={"color":"steelblue","alpha":0.5,"lw":3}, label = 'Important variables')

ax.tick_params(labelsize=18)
ax.set_xlabel(r"Experimental Total Volume Deposited (TVD) /  $\mu\text{m}^3$ ", fontsize=22)
ax.set_ylabel(r"Predicted " "\n" "Total Volume Deposited (TVD) /  $\mu\text{m}^3$ ", fontsize=22)
plt.legend(prop={"size":16}, loc = 4)

plt.xticks(np.arange(0.6, 1.6, 0.1))
plt.yticks(np.arange(0.6, 1.6, 0.1))
plt.xlim([0.6, 1.5])
plt.ylim([0.6, 1.5])
```

```
Out[ ]: (0.6, 1.5)
```

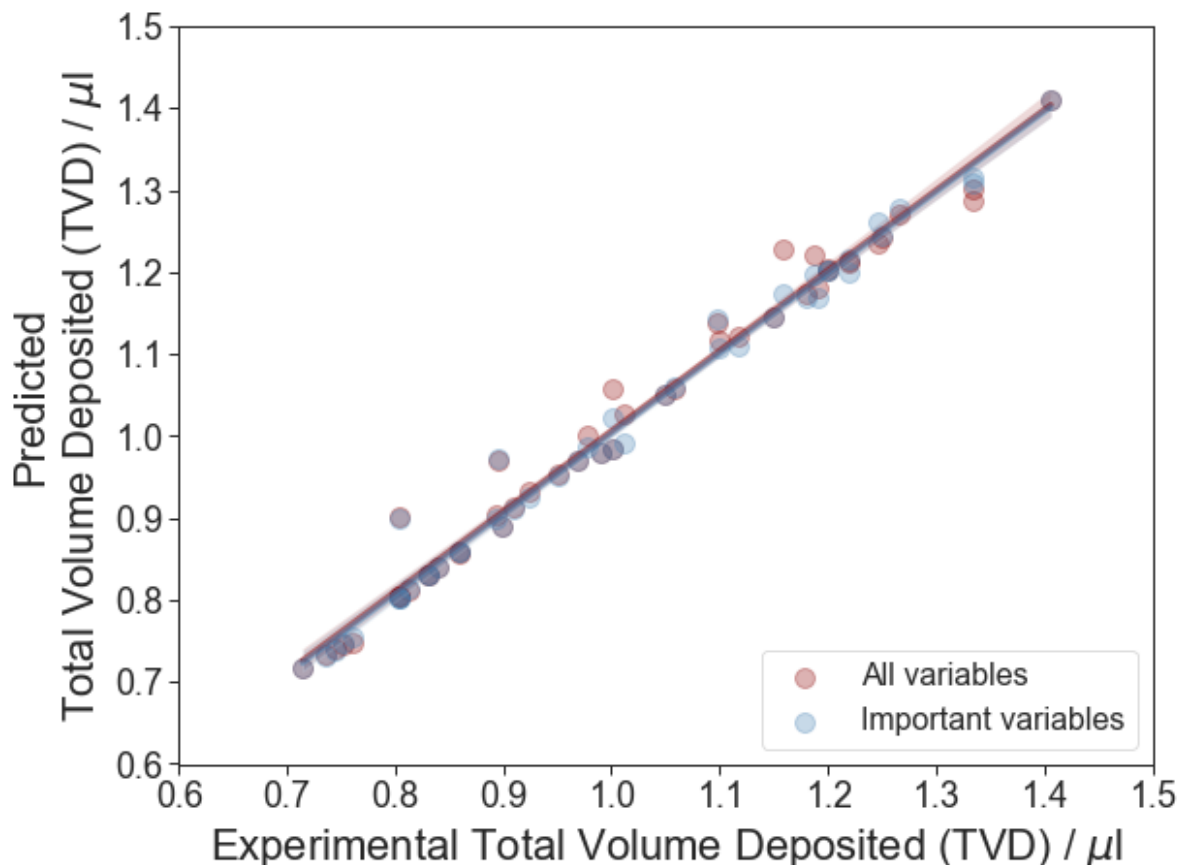

## Individual SHAP Value Plot — Local Interpretability

Individual predictions will be made based on the model results and using the SHAP library, which will also allow knowing which input parameters would be required to obtain the predicted Total Volume Deposited.

```
In [ ]: # Get the predictions and put them with the test data.
X_output_TVD_shap = X_train_TVD_reduced.copy()
X_output_TVD_shap.loc[:, 'predict'] = np.round(ideal_model_rf_TVD_reduced.predict(X

# Randomly pick some observations
random_picks = np.arange(1,30,1) # Every 1 rows
S_TVD_shap = X_output_TVD_shap.iloc[random_picks]
S_TVD_shap
```

Out[ ]:

|     | Average Drop Volume (pl) | n° of drops | predict |
|-----|--------------------------|-------------|---------|
| 229 | 225.0                    | 5263.157895 | 1.18    |
| 69  | 225.0                    | 2770.083102 | 0.60    |
| 168 | 225.0                    | 4166.666667 | 0.93    |
| 109 | 190.0                    | 5882.352941 | 1.11    |
| 124 | 210.0                    | 5000.000000 | 1.05    |
| 79  | 220.0                    | 3267.973856 | 0.72    |
| 86  | 212.5                    | 3906.250000 | 0.83    |
| 95  | 190.0                    | 4081.632653 | 0.77    |
| 219 | 190.0                    | 6666.666667 | 1.26    |
| 117 | 190.0                    | 6250.000000 | 1.20    |
| 38  | 200.0                    | 4545.454545 | 0.91    |
| 24  | 227.5                    | 4444.444444 | 1.01    |
| 67  | 225.0                    | 3906.250000 | 0.88    |
| 186 | 215.0                    | 3906.250000 | 0.84    |
| 199 | 215.0                    | 3906.250000 | 0.84    |
| 10  | 190.0                    | 6666.666667 | 1.26    |
| 120 | 225.0                    | 6250.000000 | 1.41    |
| 29  | 140.0                    | 6535.947712 | 0.95    |
| 153 | 180.0                    | 5882.352941 | 1.06    |
| 68  | 200.0                    | 4464.285714 | 0.90    |
| 75  | 190.0                    | 5555.555556 | 1.06    |
| 5   | 182.0                    | 6666.666667 | 1.22    |
| 56  | 210.0                    | 6250.000000 | 1.30    |
| 114 | 220.0                    | 3906.250000 | 0.86    |
| 139 | 210.0                    | 3906.250000 | 0.82    |
| 193 | 205.0                    | 6250.000000 | 1.28    |
| 65  | 230.0                    | 3460.207612 | 0.79    |
| 142 | 225.0                    | 4444.444444 | 1.00    |
| 195 | 215.0                    | 3906.250000 | 0.84    |

In [ ]: X\_output\_TVD\_shap.mean()

Out[ ]: Average Drop Volume (pl) 203.336957  
n° of drops 4976.595225  
predict 0.996739  
dtype: float64

In [ ]: *# Function to calculate SHAP force plots based on the predictions on the test set*  
**def** shap\_plot(j):  
explainerModel = shap.TreeExplainer(ideal\_model\_rf\_TVD\_reduced)  
shap\_values\_Model = explainerModel.shap\_values(S\_TVD\_shap)

```

p = shap.force_plot(explainerModel.expected_value, shap_values_Model[j],
                    S_TVD_shap.iloc[[j]], matplotlib = False,
                    show = False) # set matplotlib to False for JS

return(p)

```

## Figure S13

In [ ]: shap\_plot(10)

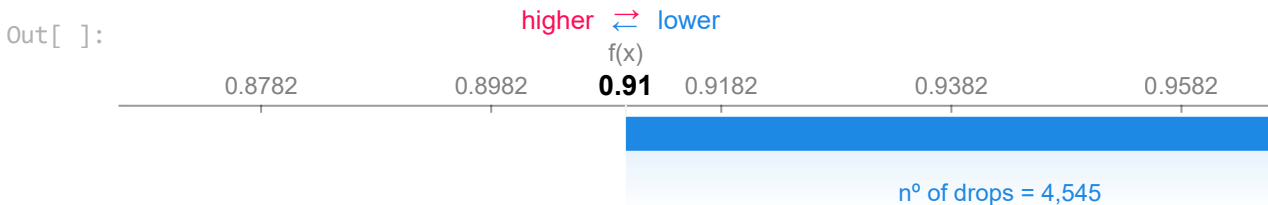

## Figure 6c

In [ ]: shap\_plot(20)

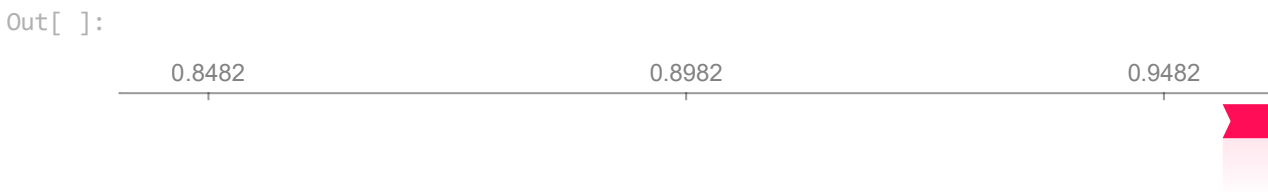

## Figure 7

```

In [ ]: # Represent bubble graph from SHAP predictions
fig, ax = plt.subplots(figsize=(9, 7))

g1 = sns.scatterplot(x = 'Average Drop Volume (p1)', y = 'n° of drops', data = S_TV
                    hue = 'predict', alpha = 0.5, s = 200)

"""g2 = sns.regplot(x = 'Average Drop Volume (p1)', y = 'n° of drops', data = S_TV
                    line_kws={"color":"black","alpha":0.5,"lw":3})"""

ax.tick_params(labelsize=20)
ax.set_xlabel("Average Drop Volume (ADV) (p1)", fontsize=24);
ax.set_ylabel("N° of drops (NoD)", fontsize=24);
#ax.legend(fontsize = 14, loc = 1)

# Call Legend twice
color_leg = ax.legend(loc = 3, fontsize = 16, title = 'Total Volume \nDeposited (TV)')

plt.xticks(np.arange(120, 250, 20));
plt.yticks(np.arange(1000, 10000, 1000));
plt.xlim([120,240]);
plt.ylim([2000,7500]);

```

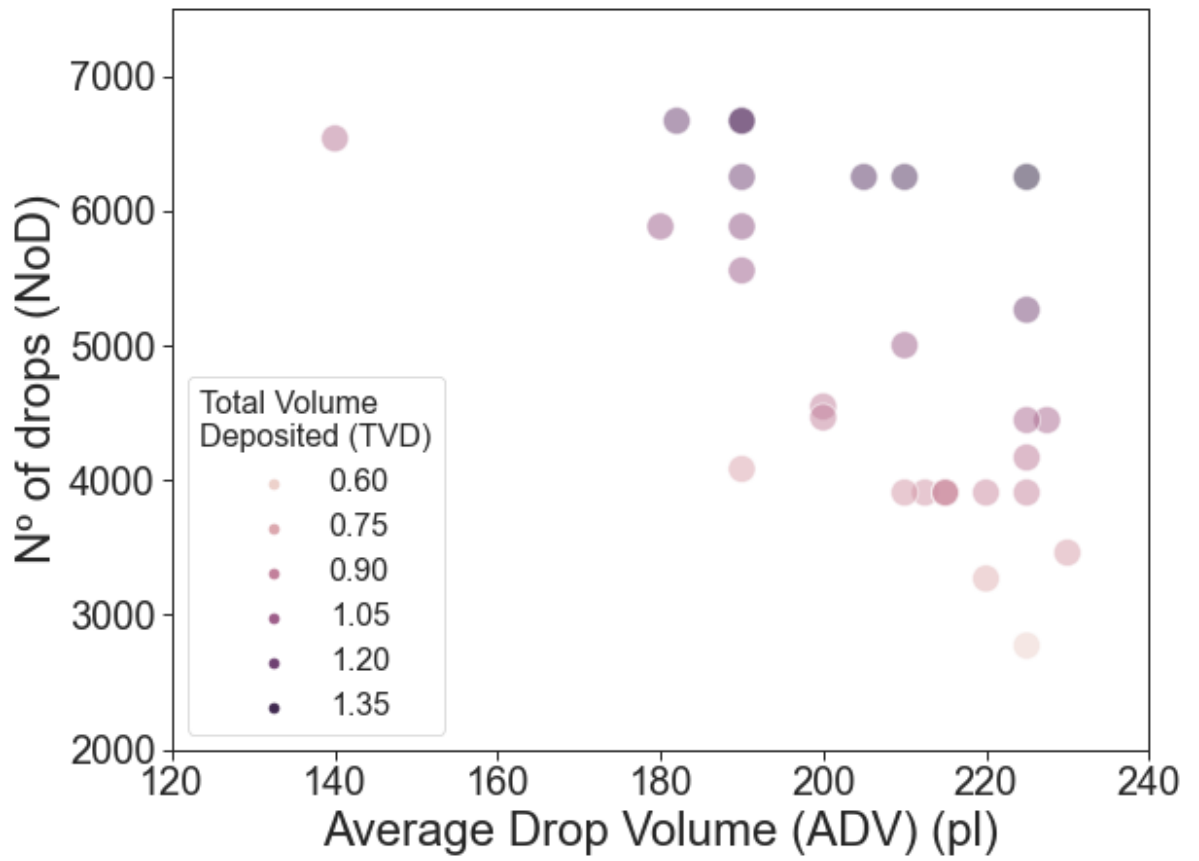

Supplement: d1tc05913k4.pdf [file d1tc05913k4.pdf]
